# Supplementary material for: Spindle assembly checkpoint proteins are positioned close to core microtubule attachment sites at kinetochores
Source: PubMed Central journal article supplement — J Cell Biol. 2013 Sep 2;202(5):735–46. doi: 10.1083/jcb.201304197 (PMC3760617; doi:10.1083/jcb.201304197), 2013-09-02
Supplement: supp_jcb.201304197_JCB_201304197_sm.pdf [file supp_jcb.201304197_JCB_201304197_sm.pdf]

Varma et al., <http://www.jcb.org/cgi/content/full/jcb.201304197/DC1>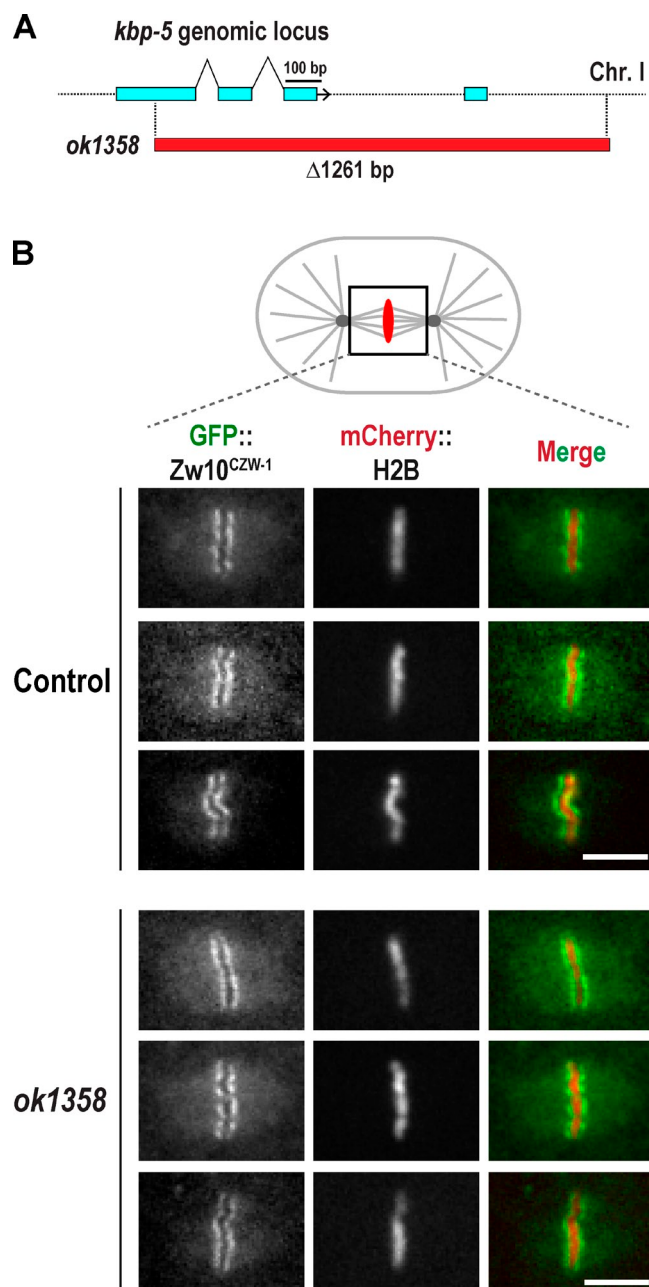

Figure S1. **RZZ localization to kinetochores is normal in *C. elegans* mutants lacking the Zwint1 homologue KBP-5.** (A) Schematic of the *kbp-5* genomic locus and the *ok1358* deletion mutant allele. Chr., chromosome. (B) Images showing kinetochore localization of GFP-Zw10 in metaphase one-cell-stage embryos expressing mCherry-H2B. Three examples are shown for both control (top) and the *ok1358* mutant (bottom) allele. Bars, 5  $\mu$ m.

A

|              | Percentage lost by RNAi |      |           |      |         |      |
|--------------|-------------------------|------|-----------|------|---------|------|
|              | Knl1 KD                 |      | Zwint1 KD |      | Hec1 KD |      |
|              | RZZ                     | Mad1 | RZZ       | Mad1 | RZZ     | Mad1 |
| Prometaphase | 99%                     | 99%  | 57%       | 35%  | 51%     | 91%  |
| Nocodazole   | 98%                     | 85%  | 61%       | 37%  | 11%     | 11%* |

\* from Deluca et al., 2003

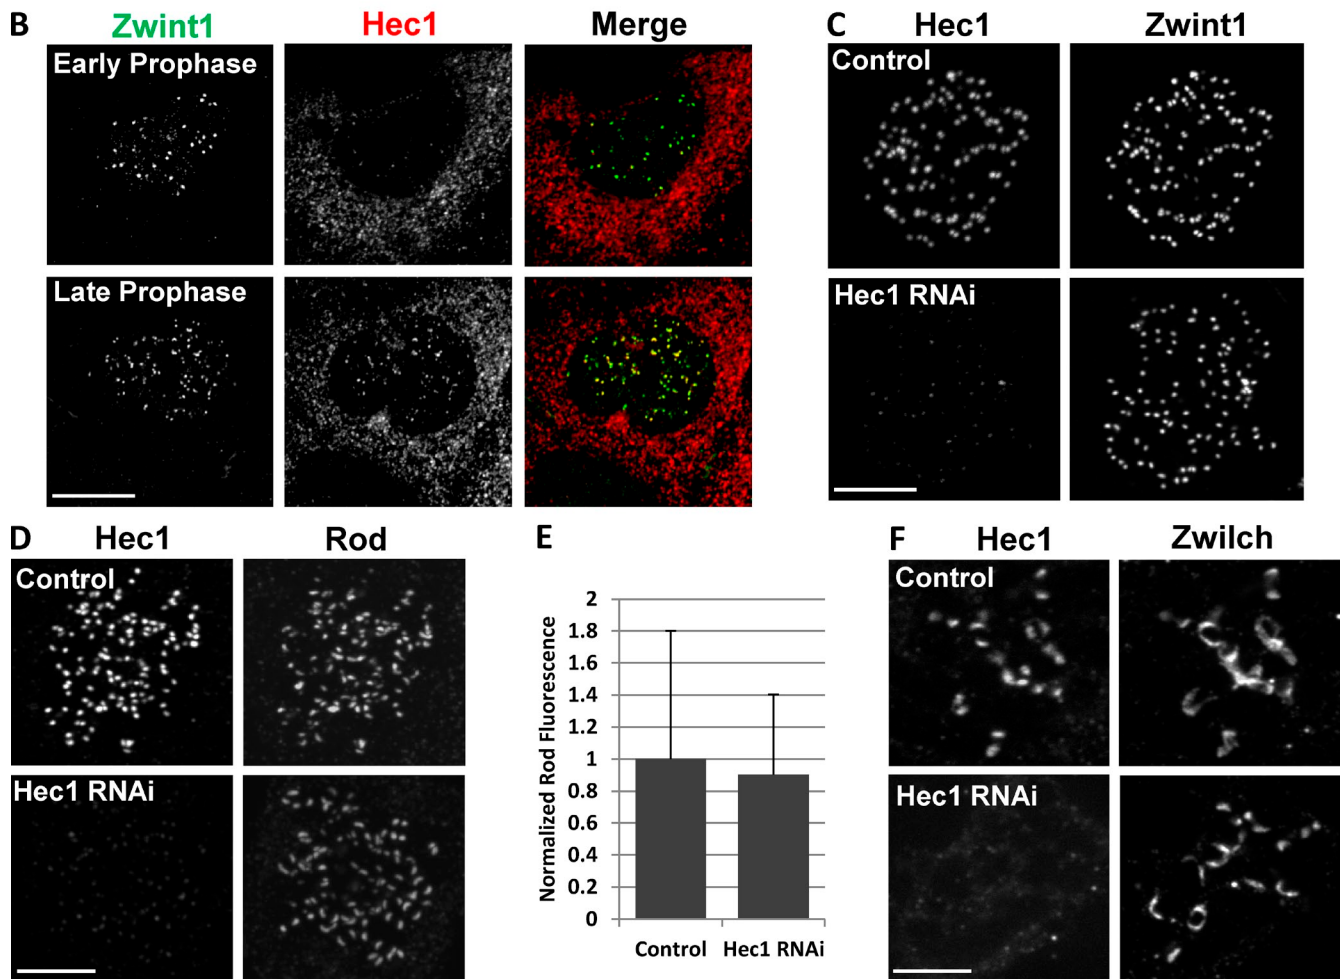

Figure S2. **Hec1 is not required for Zwint1-RZZ recruitment in nocodazole-treated cells.** (A) Summary of the analysis of kinetochore recruitment of the RZZ complex and Mad1 in normal and nocodazole-treated prometaphase HeLa cells. KD, knockdown. (B) HeLa cells in early prophase (top) or late prophase (bottom) were immunostained using anti-Zwint1 and anti-Hec1 antibodies. (C) Control and Hec1 siRNA-treated HeLa cells were immunostained using anti-Zwint1 and anti-Hec1 antibodies. (D) HeLa cells as in C were immunostained using anti-Rod and anti-Hec1 antibodies. (E) Rod fluorescence was normalized relative to that of Hec1 in control and Hec1-depleted cells.  $n = 130$  kinetochores;  $P > 0.4$  (not significant). Error bars are SD from the means. (F) Control and Hec1 siRNA-treated PtK2 cells were immunostained using anti-Zwilch and anti-Hec1 antibodies. Bars, 5  $\mu$ m.

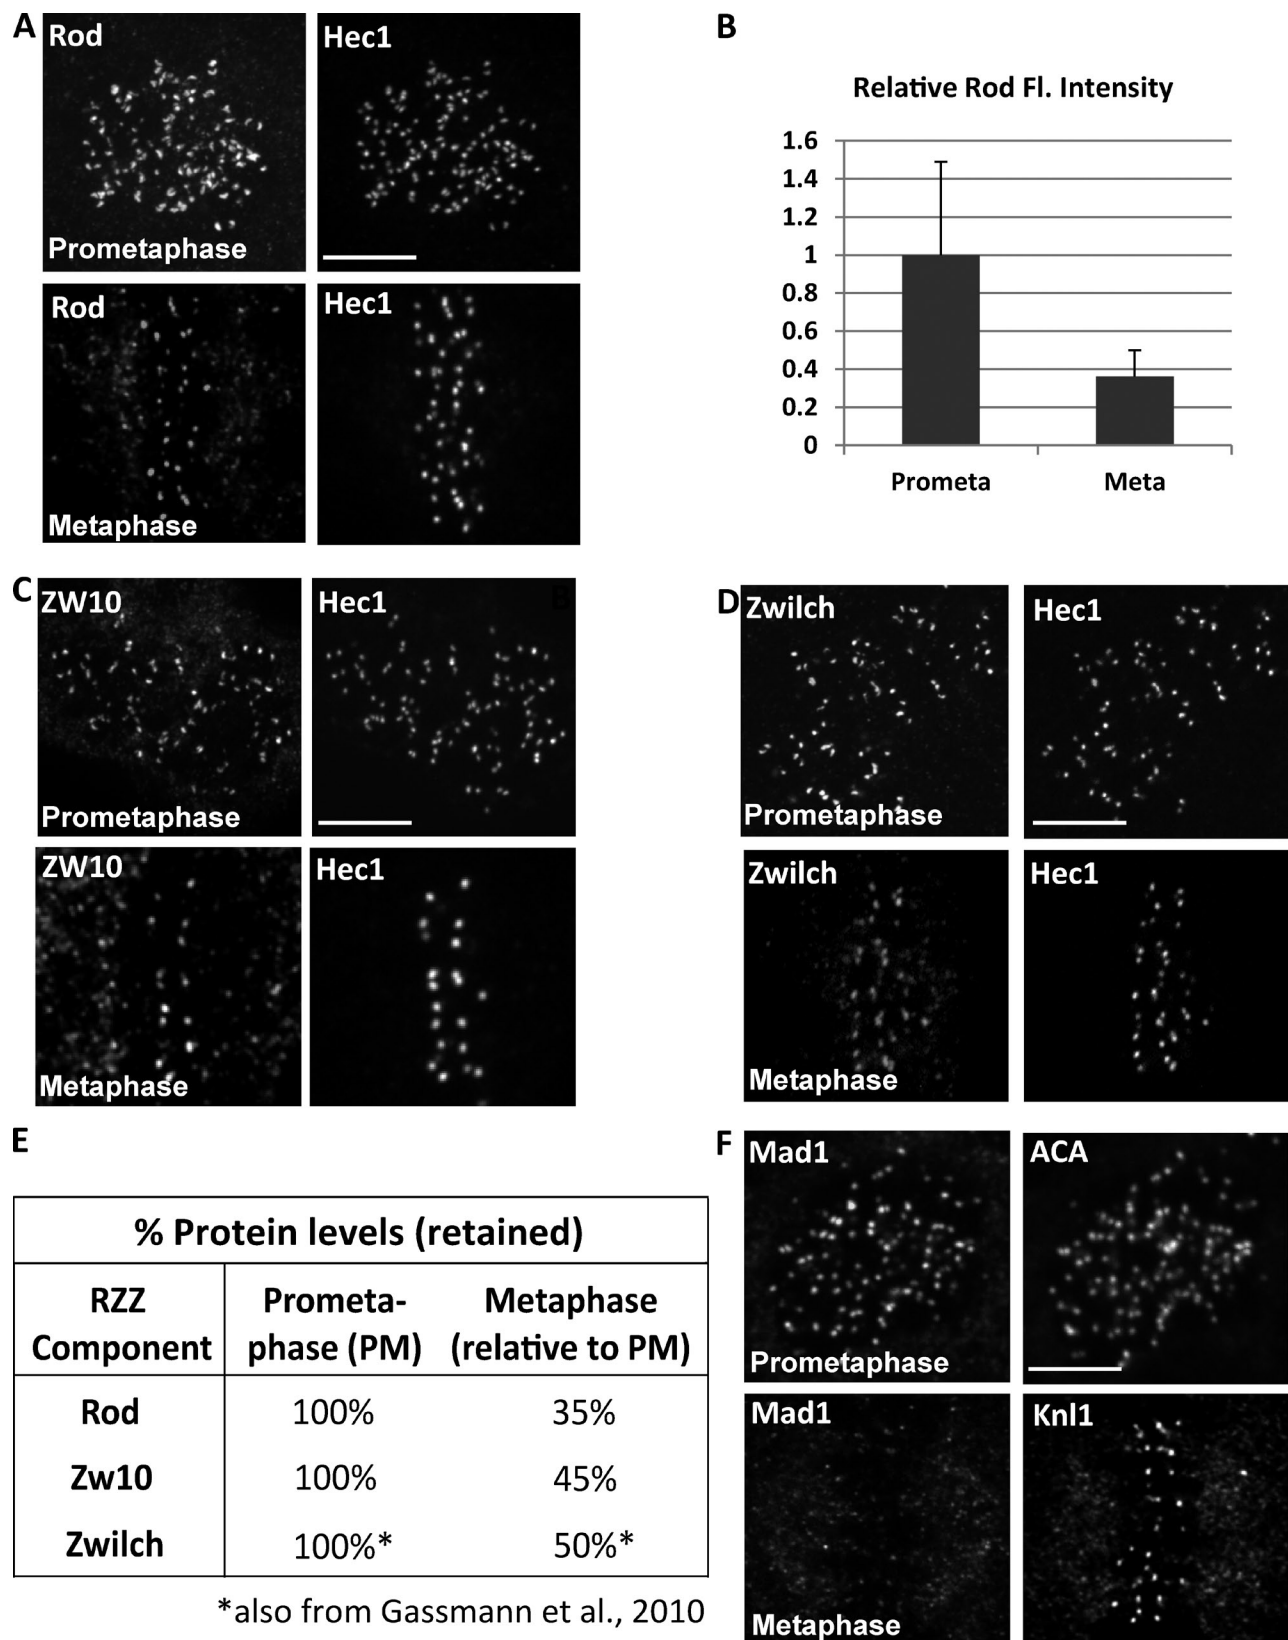

Figure S3. **Components of the RZZ complex are retained substantially at metaphase kinetochores unlike Mad1.** (A) HeLa cells in prometaphase (top) or metaphase (bottom) were immunostained using anti-Rod and anti-Hec1 antibodies. (B) Rod fluorescence (Fl.) was normalized relative to that of Hec1 in prometaphase (Prometa;  $n = 65$ ) versus metaphase cells (Meta;  $n = 100$ ).  $P < 0.001$ . Error bars are SD from the means. (C) HeLa cells as in A were immunostained using anti-Zw10 and anti-Hec1 antibodies. (D) HeLa cells as in A were immunostained using anti-Zwilch and anti-Hec1 antibodies. (E) Summary of the analysis of the levels of RZZ complex retained at prometaphase and metaphase kinetochores of HeLa cells. (F) HeLa cells as in A were immunostained using anti-Mad1 and either the anti-ACA (top) or Knl1 antibody (bottom). Bars, 5  $\mu\text{m}$ .

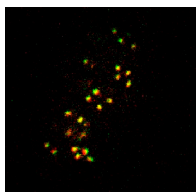

Video 1. **Example of metaphase HeLa cells expressing Hec1-GFP/mCherry-CENP-C used to make live Delta measurements.** Double thymidine-synchronized HeLa cells were transfected with cDNA plasmids encoding Hec1-GFP and mCherry-CENP-C and subjected to continuous tandem two-color live imaging during metaphase using an inverted microscope (TE300). Videos were generated from merged z stacks of images obtained from both the channels in which each frame was played for 1/6 s.

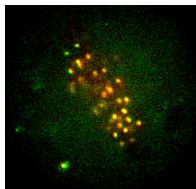

Video 2. **Example of metaphase HeLa cells expressing Zwint1-GFP/Hec1-tdTomato used to make live Delta measurements.** Double thymidine-synchronized HeLa cells were transfected with cDNA plasmids encoding Zwint1-GFP and Hec1-tdTomato and subjected to continuous tandem two-color live imaging during metaphase using an inverted microscope (TE300). Videos were generated from merged z stacks of images obtained from both the channels where each frame was played for 1/6 s.
